# Supplementary material
Source: PubMed Central journal article supplement (PMC3311708)
Supplement: NIHMS353160-supplement-1.pdf [file NIHMS353160-supplement-1.pdf]

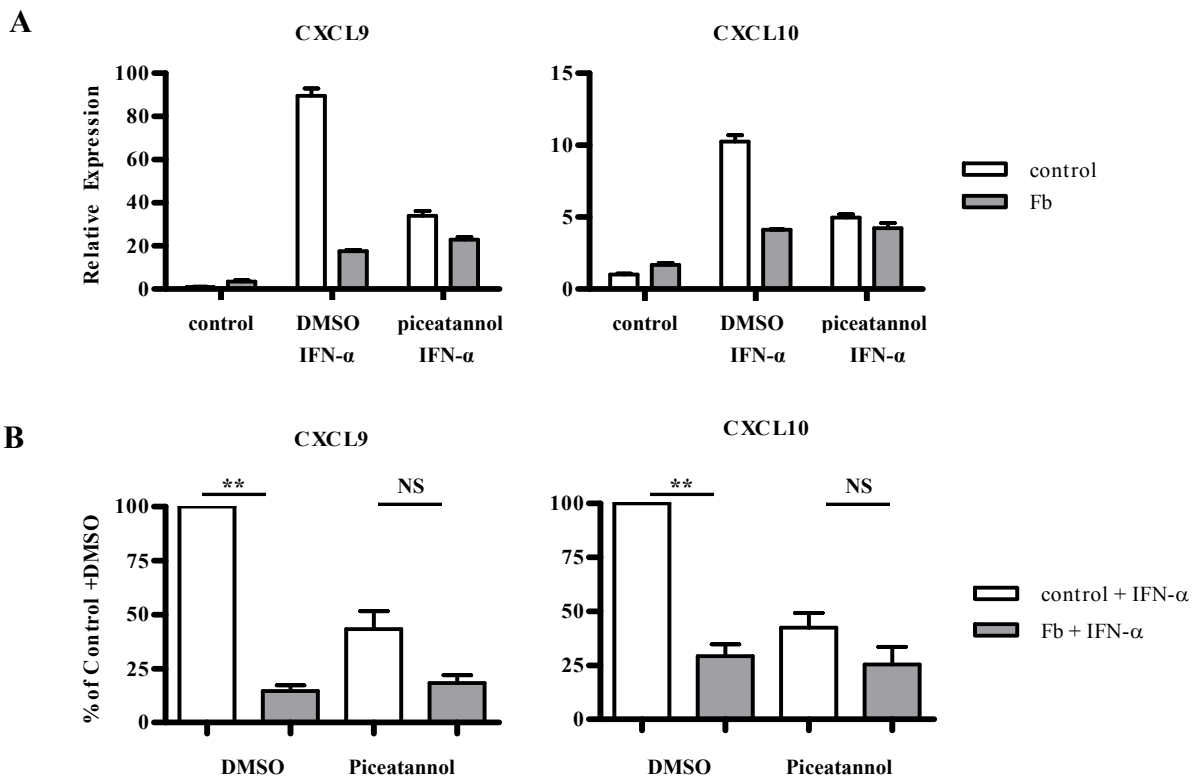

**Figure S1.**  $\beta_2$  integrin mediated inhibition of type I IFN signaling is Syk-dependent.

Primary human macrophages were pretreated with either the vehicle control DMSO or Syk inhibitor piceatannol (80  $\mu$ M) for 30 min. Macrophages were then plated onto control wells or fibrinogen (Fb) coated wells for 2 h, and IFN- $\alpha$  (1000 U/mL) was added for an additional 2 h to assess induction of IFN- $\alpha$  response genes.

*A*, One representative donor is shown. mRNA expression was measured by qPCR, and results are presented as mean  $\pm$  SD of triplicate wells normalized relative to GAPDH mRNA.

*B*, Cumulative data from 3 donors is presented as mean  $\pm$  SEM. Transcript expression from cells plated onto control wells and given IFN- $\alpha$  in the DMSO condition was set as 100%, and expression in all other conditions were set relative to that control. In the control DMSO condition, inhibition of CXCL9 by Fb was statistically significant ( $p = 0.0010$ , paired Student  $t$  test); in the piceatannol condition however, difference between the control and Fb conditions was no longer significant ( $p = 0.1237$ , paired Student  $t$  test). Similarly, inhibition of CXCL10 by Fb in the control DMSO condition was statistically significant ( $p = 0.0062$ , paired Student  $t$  test); in the piceatannol condition however, difference between the control and Fb conditions was no longer significant ( $p = 0.2029$ , paired Student  $t$  test).

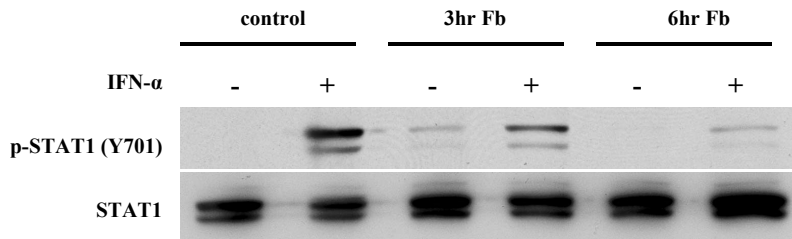

**Figure S2.**  $\beta$ 2 integrin mediated inhibition of type I IFN signaling is time dependent.

Primary human monocyte-derived macrophages were plated onto control wells or fibrinogen (Fb) coated wells for 3 or 6 h, and then IFN- $\alpha$  (1000 U/mL) was added for an additional 15 min to assess phosphorylation of STAT1. Whole cell lysates were immunoblotted with Abs against phospho-STAT1 (Y701) and STAT1. Data are representative of 2 independent experiments.

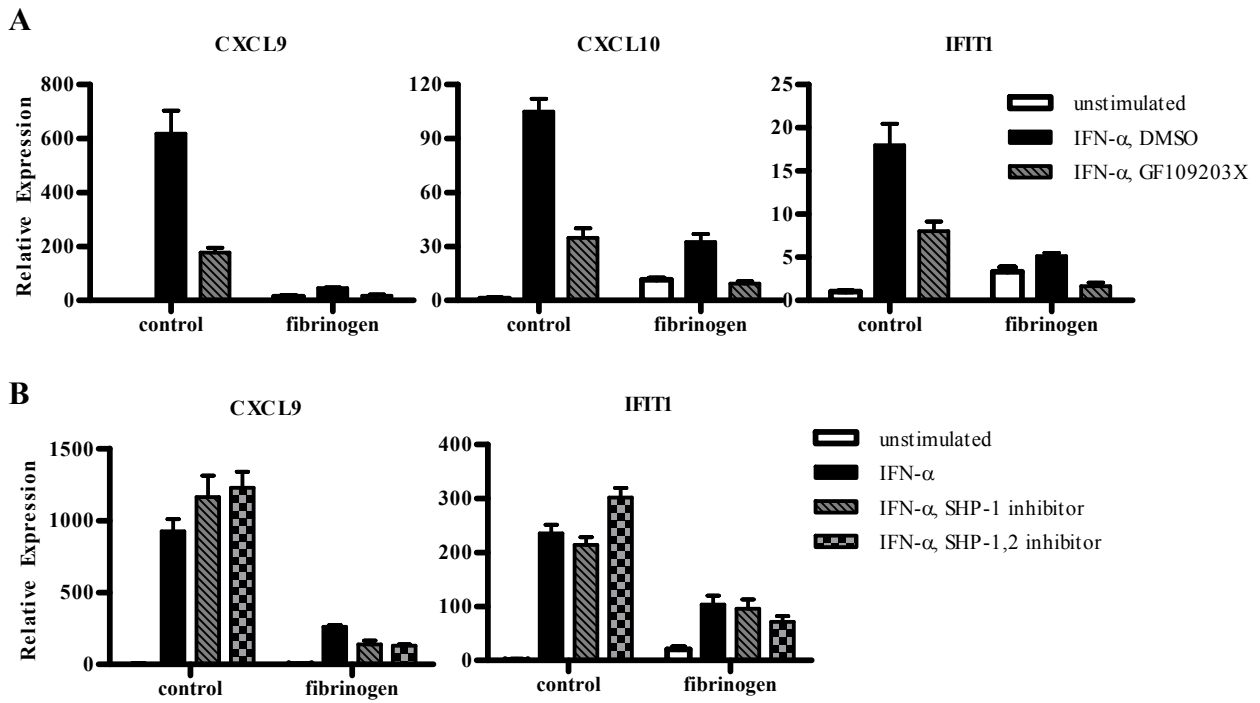

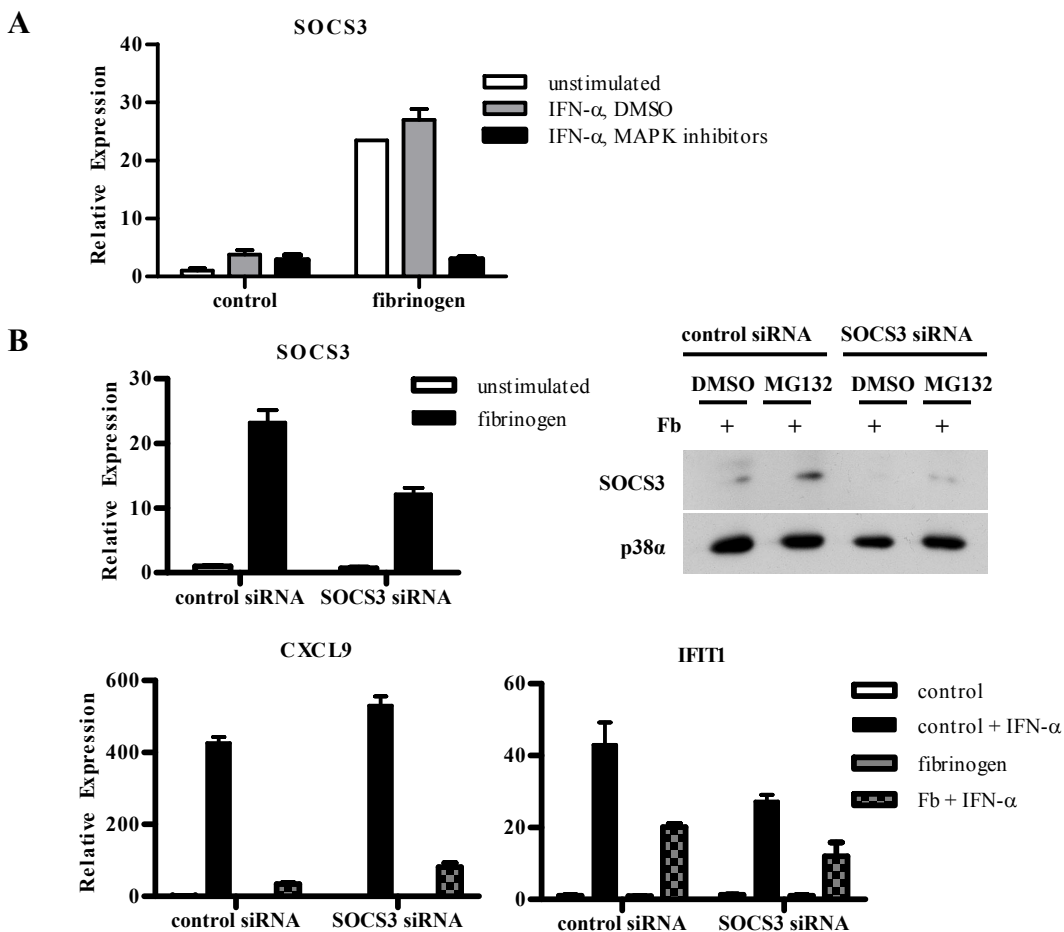

**Figure S4.**  $\beta$ 2 integrin signaling induces SOCS3 expression in a MAPK-dependent manner.

*A*, Primary human macrophages were pretreated with either the vehicle control DMSO or two MAPK inhibitors: p38 inhibitor SB203580 (15  $\mu$ M) and MEK inhibitor U0126 (15  $\mu$ M) for 30 min. Treated macrophages were plated onto control wells or fibrinogen (Fb) coated wells for 2 h, and then IFN- $\alpha$  (1000 U/mL) was added for an additional 2 h. mRNA expression was measured by qPCR, and results are presented as mean  $\pm$  SD of triplicate wells normalized relative to GAPDH mRNA. Data are representative of at least 3 independent experiments.

*B*, Macrophages were nucleofected with non-specific (control) or SOCS3-specific short interfering RNAs (siRNA) and were plated onto coated wells 3 days later. The top panels show knockdown efficiency. For SOCS3 mRNA detection, cells were plated onto coated wells for 4 h. For the immunoblot, the proteasome inhibitor MG-132 (20  $\mu$ M) was used to stabilize and facilitate detection of SOCS3 protein. After 30 min incubation with MG-132, cells were plated onto Fb coated wells for 6 h, and whole cell lysates were immunoblotted with Abs against SOCS3 and p38 $\alpha$ . The bottom panels show intact  $\beta$ 2 integrin mediated inhibition of type I IFN signaling. Macrophages were plated onto wells for 4 h, and then IFN- $\alpha$  (1000 U/mL) was added for an additional 2 h to assess induction of IFN- $\alpha$  response genes. mRNA expression was measured by qPCR, and results are presented as mean  $\pm$  SD of triplicate wells normalized relative to GAPDH mRNA. Data are representative of 2 independent experiments.
